# Supplementary material for: A systematic review and meta-analysis on the effect of neoadjuvant chemotherapy on complications following immediate breast reconstruction
Source: PubMed Central journal article supplement — Breast. 2020 Dec 3;55:55–62. doi: 10.1016/j.breast.2020.11.023 (PMC7750646; doi:10.1016/j.breast.2020.11.023), 2020-12-03
Supplement: mmc2.pdf [file mmc2.pdf]

Identification

Records identified through  
database searching  
(n = 447)

Additional records identified  
through other sources  
(n = 0)

Screening

Records after duplicates removed  
(n = 268)

Records screened  
(n = 268)

Records excluded  
(n = 169)

Eligibility

Full-text articles assessed  
for eligibility  
(n = 99)

Full-text articles excluded, did  
not meet inclusion criteria  
(n = 86)

Included

Studies included in  
qualitative synthesis  
(n = 13)

Additional records identified  
through reference search  
(n = 4)

Studies included in  
quantitative synthesis  
(meta-analysis)  
(n = 17)
